# Supplementary material
Source: publisher site journal article supplement (https://www.dovepress.com/article/607376)
Supplement: Supplementary file 1 [file 607376%20Revised%20Supplementary%20File.pdf]

## Supplementary File 1: Overall HIV-KQ-18 Performance

| Item | HIV-KQ-18 Statement                                                                                                  | Correct Response | Percent correct response n (%) |
|------|----------------------------------------------------------------------------------------------------------------------|------------------|--------------------------------|
| 1    | Coughing and sneezing DO NOT spread HIV                                                                              | T                | 995 (76.77)                    |
| 2    | A person can get HIV by sharing a glass of water with someone who has HIV                                            | F                | 1,307 (80.08)                  |
| 3    | Pulling out the penis before a man climaxes/cums keeps a woman from getting HIV during sex                           | F                | 968 (74.98)                    |
| 4    | A woman can get HIV if she has anal sex with a man                                                                   | T                | 994 (73.12)                    |
| 5    | Showering, or washing one's genitals/private parts after sex keeps a person from getting HIV                         | F                | 1,089 (84.22)                  |
| 6    | All pregnant women infected with HIV will have babies born with AIDS                                                 | F                | 922 (71.36)                    |
| 7    | People who have been infected with HIV quickly show serious signs of being infected                                  | F                | 1,045 (80.82)                  |
| 8    | There is a vaccine that can stop adults from getting HIV                                                             | F                | 769 (59.75)                    |
| 9    | People are likely to get HIV by deep kissing, putting their tongue in their partner's mouth if their partner has HIV | F                | 700 (54.43)                    |
| 10   | A woman cannot get HIV if she has sex during her period                                                              | F                | 1,004 (78.13)                  |
| 11   | There is a female condom that can help decrease a woman's chance of getting HIV                                      | T                | 783 (60.70)                    |
| 12   | A natural skin condom works better against HIV than does a latex condom                                              | F                | 512 (39.75)                    |
| 13   | A person will NOT get HIV if he or he is taking antibiotics                                                          | F                | 1,004 (78.13)                  |
| 14   | Having sex with more than one partner can increase a person's chance of being infected with HIV                      | T                | 1,088 (84.60)                  |
| 15   | Taking a test for HIV one week after having sex will tell a person if she or he has HIV                              | F                | 713 (55.27)                    |
| 16   | A person can get HIV by sitting in a hot tub or a swimming pool with a person who has HIV                            | F                | 1,001 (77.66)                  |
| 17   | A person can get HIV from oral sex                                                                                   | T                | 730 (56.68)                    |
| 18   | Using Vaseline or baby oil with condoms lowers the chance of getting HIV                                             | F                | 990 (69.93)                    |
